# Supplementary material for: Using citizen science in the photo-identification of adult individuals of an amphibian based on two facial skin features
Source: PeerJ. 2021 Apr 9;9:e11190. doi: 10.7717/peerj.11190 (PMC8040853; doi:10.7717/peerj.11190)
Supplement: Supplemental Information 1 — The total number of survey questions answered correctly by each partiicpant has been shown (1= answered correctly, 0= answered incoroectly). [file peerj-09-11190-s001.xlsx]

## Sheet: Sheet1
Date and time of survey event	Participant	Question 1 answered correctly?	Question 2 answered correctly?	Question 3 answered correctly?	Question 4 answered correctly?	Question 5 answered correctly?	Question 6 answered correctly?	Question 7 answered correctly?	Question 8 answered correctly?	Question 9 answered correctly?	Question 10 answered correctly?	Question 11 answered correctly?	Question 12 answered correctly?	Question 13 answered correctly?	Question 14 answered correctly?	Question 15 answered correctly?	Question 16 answered correctly?	Question 17 answered correctly?	Question 18 answered correctly?	Question 19 answered correctly?	Question 20 answered correctly?	Question 21 answered correctly?	Question 22 answered correctly?	Question 23 answered correctly?	Question 24 answered correctly?	Question 25 answered correctly?	Question 26 answered correctly?	Question 27 answered correctly?	Question 28 answered correctly?	Question 29 answered correctly?	Question 30 answered correctly?	Time to complete survey	Country	Region	City	Total questions answered correct
2019-05-30 19:49:11	1	1	1	0	0	0	0	0	0	0	0	1	0	0	0	1	0	0	1	0	0	0	1	0	0	0	0	0	0	0	0	317	Australia	New South Wales	Blacktown	6
2019-05-30 20:58:14	2	1	1	1	0	1	0	1	0	1	0	1	1	0	0	1	0	1	0	0	1	1	1	0	1	0	0	0	0	0	0	501	Australia	New South Wales	Erina	14
2019-05-29 07:15:49	3	1	1	1	0	1	1	1	0	1	0	1	0	0	1	1	1	1	0	1	1	1	1	0	0	0	1	0	1	0	1	522	Australia	New South Wales	Chatswood	19
2019-05-27 23:17:22	4	1	1	0	1	0	1	1	0	1	0	1	0	0	0	1	0	0	1	0	0	1	1	0	0	1	0	0	0	0	0	447	Australia	New South Wales	Jamberoo	12
2019-05-28 11:07:06	5	1	0	1	0	1	0	1	0	1	0	1	1	0	0	1	0	0	0	0	0	0	1	0	1	0	0	0	0	0	1	416	Australia	New South Wales	Ultimo	11
2019-05-31 13:31:59	6	1	1	1	1	1	1	1	1	1	1	1	1	0	1	1	1	1	1	1	1	1	1	1	1	1	1	1	1	1	1	533	Hong Kong SAR China	Central and Western District	Central	29
2019-05-27 12:46:59	7	1	1	1	1	1	1	1	1	1	1	1	1	0	1	1	1	1	1	1	1	1	1	1	1	1	1	1	1	1	1	1685	Australia	New South Wales	Avoca Beach	29
2019-05-27 13:46:30	8	1	1	1	1	1	1	1	1	1	1	1	1	1	1	1	1	1	1	1	1	1	1	1	1	1	1	1	1	1	1	3725	Australia	New South Wales	Rozelle	30
2019-05-27 13:52:06	9	1	1	1	1	1	1	1	1	1	1	1	1	1	1	1	1	1	1	1	1	1	1	1	1	1	1	1	1	1	1	1211	Australia	New South Wales	Nelson Bay	30
2019-05-27 14:37:06	10	1	1	1	1	1	1	1	1	1	1	1	1	1	1	1	1	1	1	1	1	1	1	1	1	1	1	1	1	1	1	513	Australia	New South Wales	Wee Waa	30
2019-05-27 16:57:03	11	1	1	1	1	1	1	1	1	1	1	1	1	1	1	1	1	1	1	1	1	1	1	1	1	1	1	1	1	1	1	347	Australia	New South Wales	Sydney	30
2019-05-28 10:00:07	12	1	1	1	1	1	1	1	1	1	1	1	1	1	1	1	1	1	1	1	1	1	1	1	1	1	1	1	1	1	1	507	Australia	Queensland	Brisbane	30
2019-05-28 12:04:03	13	1	1	1	1	1	1	1	1	1	1	1	1	1	1	1	1	1	1	1	1	1	1	1	1	1	1	1	1	1	1	342	Australia	Queensland	Tamborine Mountain	30
2019-05-29 08:39:08	14	1	1	1	1	1	1	1	1	1	1	1	1	1	1	1	1	1	1	1	1	1	1	1	1	1	1	1	1	1	1	708	United States	North Carolina	Charlotte	30
2019-05-29 08:51:09	15	1	1	1	1	1	1	1	1	1	1	1	1	1	1	1	1	1	1	1	1	1	1	1	1	1	1	1	1	1	1	543	United States	Iowa	Wapello	30
2019-05-29 14:36:33	16	1	1	1	1	1	1	1	1	1	1	1	1	1	1	1	1	1	1	1	1	1	1	1	1	1	1	1	1	1	1	532	Australia	New South Wales	Woonona	30
2019-05-29 16:09:41	17	1	1	1	1	1	1	1	1	1	1	1	1	1	1	1	1	1	1	1	1	1	1	1	1	1	1	1	1	1	1	628	Japan	Tokushima	Tokushima	30
2019-05-29 16:58:44	18	1	1	1	1	1	1	1	1	1	1	1	1	1	1	1	1	1	1	1	1	1	1	1	1	1	1	1	1	1	1	739	Australia	New South Wales	Callaghan	30
2019-05-30 04:24:26	19	1	1	1	1	1	1	1	1	1	1	1	1	1	1	1	1	1	1	1	1	1	1	1	1	1	1	1	1	1	1	622	Germany	Land Berlin	Berlin	30
2019-05-30 12:01:07	20	1	1	1	1	1	1	1	1	1	1	1	1	1	1	1	1	1	1	1	1	1	1	1	1	1	1	1	1	1	1	493	Australia	Victoria	Balwyn	30
2019-05-30 19:26:54	21	1	1	1	1	1	1	1	1	1	1	1	1	1	1	1	1	1	1	1	1	1	1	1	1	1	1	1	1	1	1	436	Australia	New South Wales	Greenacre	30
2019-05-30 19:54:50	22	1	1	1	1	1	1	1	1	1	1	1	1	1	1	1	1	1	1	1	1	1	1	1	1	1	1	1	1	1	1	431	Australia	New South Wales	Cooma	30
2019-05-30 19:58:32	23	1	1	1	1	1	1	1	1	1	1	1	1	1	1	1	1	1	1	1	1	1	1	1	1	1	1	1	1	1	1	414	Australia	New South Wales	Sydney	30
2019-05-30 20:02:10	24	1	1	1	1	1	1	1	1	1	1	1	1	1	1	1	1	1	1	1	1	1	1	1	1	1	1	1	1	1	1	1049	Australia	New South Wales	Stanmore	30
2019-05-30 20:31:32	25	1	1	1	1	1	1	1	1	1	1	1	1	1	1	1	1	1	1	1	1	1	1	1	1	1	1	1	1	1	1	423	Australia	Queensland	Mooloolabah	30
2019-05-30 22:14:00	26	1	1	1	1	1	1	1	1	1	1	1	1	1	1	1	1	1	1	1	1	1	1	1	1	1	1	1	1	1	1	399	Hong Kong SAR China	Central and Western District	Central	30
2019-05-31 00:46:15	27	1	1	1	1	1	1	1	1	1	1	1	1	1	1	1	1	1	1	1	1	1	1	1	1	1	1	1	1	1	1	1079	Australia	New South Wales	Charlestown	30
2019-05-31 13:12:10	28	1	1	1	1	1	1	1	1	1	1	1	1	1	1	1	1	1	1	1	1	1	1	1	1	1	1	1	1	1	1	719	Hong Kong SAR China	Central and Western District	Central	30
2019-05-31 17:39:57	29	1	1	1	1	1	1	1	1	1	1	1	1	1	1	1	1	1	1	1	1	1	1	1	1	1	1	1	1	1	1	487	Hong Kong SAR China	Central and Western District	Central	30
2019-05-31 21:39:18	30	1	1	1	1	1	1	1	1	1	1	1	1	1	1	1	1	1	1	1	1	1	1	1	1	1	1	1	1	1	1	864	Australia	New South Wales	Sydney	30
2019-06-03 13:19:43	31	1	1	1	1	1	1	1	1	1	1	1	1	1	1	1	1	1	1	1	1	1	1	1	1	1	1	1	1	1	1	635	Australia	New South Wales	Balmain	30
2019-05-27 23:36:54	32	1	0	1	1	1	1	1	1	1	1	1	1	1	1	1	1	1	1	1	1	1	1	1	1	1	1	1	1	1	1	744	Australia	New South Wales	Sydney	29
2019-05-29 08:41:46	33	1	0	1	1	1	1	1	1	1	1	1	1	1	1	1	1	1	1	1	1	1	1	1	1	1	1	1	1	1	1	370	United States	Massachusetts	Lenox	29
2019-05-27 12:46:11	34	1	0	1	1	1	1	1	1	1	1	1	1	1	1	1	1	1	1	1	1	1	1	1	1	1	1	1	1	1	1	487	Australia	New South Wales	Toukley	29
2019-05-28 11:51:04	35	1	1	1	1	1	0	1	1	1	1	1	1	1	1	1	1	1	1	1	1	1	1	1	1	1	1	1	1	1	1	913	Australia	New South Wales	Sydney	29
2019-05-29 09:25:59	36	1	1	1	1	1	1	0	1	1	1	1	1	1	1	1	1	1	1	1	1	1	1	1	1	1	1	1	1	1	1	598	United States	Tennessee	Jackson	29
2019-06-02 22:09:12	37	1	1	1	1	1	1	1	1	1	1	1	1	0	1	1	0	1	1	1	1	1	1	1	1	1	1	1	1	1	1	553	Australia	New South Wales	Dulwich Hill	28
2019-05-29 08:47:13	38	1	1	1	1	1	1	1	1	1	1	1	0	1	1	1	1	0	1	1	1	1	1	1	1	1	1	1	1	1	1	290	United States	Illinois	Chicago	28
2019-05-29 08:41:25	39	1	1	1	1	1	1	1	1	1	1	1	1	1	1	1	1	0	1	1	1	1	1	1	1	1	1	1	1	1	1	266	United States	Montana	Billings	29
2019-05-28 14:03:16	40	1	1	1	0	1	1	1	1	1	1	1	1	0	0	1	0	0	0	1	0	1	1	1	1	1	1	1	1	1	1	871	Australia	New South Wales	Callaghan	23
2019-05-27 17:06:41	41	1	0	1	1	1	1	0	1	0	0	1	0	0	0	1	0	0	0	1	1	0	1	1	1	1	1	1	1	1	1	699	Australia	New South Wales	Faulconbridge	19
2019-05-28 22:25:43	42	1	1	1	1	1	0	1	1	1	1	1	1	0	1	1	1	0	0	1	1	1	0	1	1	1	1	1	1	1	1	490	Australia	New South Wales	Mosman	25
2019-05-28 22:59:44	43	1	1	1	1	1	1	1	1	1	1	1	1	1	1	1	1	1	1	1	1	1	1	0	1	1	1	1	1	1	1	747	Australia	New South Wales	Kellyville	29
2019-05-28 21:28:05	44	1	1	1	1	1	1	1	1	1	1	1	1	1	1	1	1	1	1	1	1	1	1	0	1	1	1	1	1	1	1	409	Australia	New South Wales	Newtown	29
2019-05-30 20:03:01	45	1	1	1	1	1	1	1	1	1	1	1	1	1	1	1	1	1	1	1	1	1	1	0	1	1	1	1	1	1	1	518	Australia	South Australia	Plympton	29
2019-05-28 13:33:57	46	1	1	1	1	1	1	1	1	1	1	1	0	1	1	1	1	1	1	1	1	1	1	0	1	1	1	1	1	1	1	448	Canada	British Columbia	Kelowna	28
2019-05-29 14:59:36	47	1	1	1	1	1	1	0	1	1	0	1	1	1	0	1	1	1	1	1	1	1	1	1	0	1	1	1	1	1	1	384	Australia	New South Wales	Wollongong	26
2019-05-31 19:24:56	48	1	1	1	1	1	1	1	1	1	1	1	0	0	0	1	1	1	1	1	1	1	1	1	0	0	1	1	1	1	1	389	Australia	New South Wales	Lakemba	25
2019-05-30 19:42:27	49	1	1	1	1	1	1	1	1	1	1	1	1	1	1	1	1	1	1	1	1	1	1	1	1	1	0	1	1	1	1	366	Australia	New South Wales	Petersham	29
2019-05-29 11:13:12	50	1	0	1	1	1	1	1	1	1	1	1	1	0	0	1	1	0	0	1	1	1	1	1	1	1	0	1	1	1	1	1680	Australia	New South Wales	Callaghan	24
2019-05-29 16:57:32	51	1	1	1	1	1	1	1	1	1	1	1	1	1	1	1	1	1	1	1	1	1	1	1	1	1	1	0	1	1	1	672	Australia	New South Wales	Callaghan	29
2019-05-30 19:45:17	52	1	1	1	1	1	1	1	1	1	0	1	1	0	1	1	1	1	1	1	1	1	1	1	1	1	1	0	1	1	1	539	Australia	New South Wales	Sydney	27
2019-06-03 14:24:18	53	1	1	1	1	1	1	1	1	1	1	1	1	1	1	1	1	1	0	1	1	1	1	1	1	1	1	0	1	1	1	532	Australia	New South Wales	Sydney	28
2019-05-29 17:20:39	54	1	1	1	1	1	1	1	1	1	0	1	1	1	1	1	1	0	1	1	1	1	1	0	1	1	1	0	1	1	1	407	Australia	New South Wales	Baulkham Hills	26
2019-06-03 20:47:50	55	1	1	1	1	1	1	1	1	1	1	1	1	1	1	1	1	1	1	1	1	1	1	1	1	1	1	0	1	1	1	701	Australia	New South Wales	Sydney	29
2019-05-27 18:25:36	56	1	1	1	1	1	1	1	1	1	1	1	1	1	1	1	1	1	1	1	1	1	1	1	1	1	1	0	1	1	1	334	Australia	New South Wales	Windsor Downs	29
2019-05-31 15:04:40	57	1	1	1	1	1	1	1	1	1	1	1	1	0	1	1	1	1	1	1	1	1	1	1	1	1	1	1	0	1	1	592	Australia	Queensland	Yeronga	28
2019-05-27 18:30:06	58	1	1	1	1	1	1	1	1	1	1	1	1	1	1	1	1	1	1	1	1	1	1	1	1	1	1	1	0	1	1	1423	Australia	New South Wales	Sydney	29
2019-05-31 07:15:19	59	1	1	1	1	1	1	1	1	1	1	1	1	1	1	1	1	1	0	1	1	1	1	1	1	1	1	1	0	1	1	411	Poland	Greater Poland	Kozieglowy	28
2019-06-03 16:39:30	60	1	1	1	1	1	1	1	1	1	1	1	1	1	1	1	1	1	1	1	1	1	1	1	1	0	1	1	0	1	1	456	Australia	South Australia	Unley	28
2019-05-31 14:24:12	61	1	1	1	1	1	1	1	1	1	1	1	1	1	1	1	1	1	1	1	1	1	1	1	1	0	1	0	0	1	1	511	Australia	New South Wales	Cremorne	27
2019-05-31 10:08:39	62	1	1	1	0	1	1	1	1	1	1	1	1	1	1	1	1	1	1	1	1	1	1	1	1	1	1	1	0	1	1	301	Australia	New South Wales	Stockton	28
2019-05-31 18:09:41	63	1	1	1	1	1	1	1	1	1	1	1	1	0	1	1	1	1	1	1	1	1	1	1	1	1	1	1	0	1	1	10117	Australia	Queensland	Sunnybank	28
2019-05-31 03:07:52	64	1	0	1	1	1	0	1	1	1	1	1	0	1	1	1	1	1	1	1	1	1	1	1	1	1	1	0	0	1	1	10022	United States	District of Columbia	Washington	25
2019-05-29 09:17:50	65	1	1	1	0	1	1	1	1	1	1	1	1	1	1	1	1	1	1	1	1	1	1	1	0	1	0	1	1	0	1	491	Australia	New South Wales	Newtown	26
2019-05-31 21:03:01	66	1	1	1	1	1	0	1	1	0	1	1	1	1	1	1	1	1	0	1	1	1	0	0	1	1	0	0	1	0	1	850	Australia	New South Wales	Parramatta	22
2019-05-30 09:11:38	67	1	1	1	1	1	1	1	1	1	1	1	1	0	1	1	1	0	1	1	1	1	1	1	1	1	1	1	0	0	1	266	Australia	New South Wales	Singleton	26
2019-05-30 22:01:49	68	1	1	1	1	1	0	0	1	1	0	1	1	0	0	1	0	1	1	1	1	1	1	0	1	0	1	0	0	0	1	623	Australia	New South Wales	Avoca Beach	19
2019-05-30 09:49:33	69	1	1	1	0	1	0	1	1	1	1	1	1	0	0	1	1	1	1	1	1	1	1	0	1	0	1	0	1	0	1	1909	Australia	New South Wales	Merrylands	22
2019-05-30 20:29:33	70	1	1	0	1	1	1	0	1	1	1	1	1	0	1	1	1	0	1	1	1	1	1	0	1	1	1	0	1	0	1	815	Australia	New South Wales		23
2019-05-31 17:45:13	71	1	1	0	1	1	1	1	1	1	1	1	1	1	0	1	1	0	0	1	1	1	1	0	1	1	1	0	0	0	1	504	Australia	New South Wales	Kellyville	22
2019-05-29 21:33:24	72	1	1	0	1	1	0	1	1	1	1	1	1	1	0	0	0	0	1	1	1	1	1	1	0	1	0	0	0	0	0	1263	Australia	New South Wales	Lakemba	18
2019-05-30 15:18:43	73	1	1	1	1	0	0	1	1	1	0	1	0	0	0	1	1	0	1	1	0	0	1	1	1	1	0	0	0	0	0	373	Australia	New South Wales	Forster	16
2019-05-29 07:17:37	74	1	1	1	1	1	1	1	1	1	1	1	0	1	1	1	1	1	1	1	1	1	1	1	1	1	1	1	1	1	0	944	Australia	New South Wales	Homebush	28
2019-05-29 09:27:38	75	1	0	1	1	1	1	1	1	1	1	1	1	1	0	1	1	1	1	1	1	1	1	1	1	1	1	1	0	1	0	396	United States	New York	Brooklyn	26
2019-06-03 21:39:37	76	1	1	1	1	1	1	0	1	1	1	1	0	0	1	1	1	0	1	0	1	1	1	1	1	1	1	0	0	1	0	337	Australia	South Australia	Blackwood	22
2019-05-28 17:21:41	77	1	1	1	1	1	1	1	1	1	1	1	1	0	1	1	1	0	0	1	0	1	1	1	0	1	1	0	0	1	0	372	Australia	Queensland	Moorooka	22
2019-05-27 12:51:36	78	1	1	1	1	1	0	1	1	1	1	1	0	0	1	1	1	0	1	1	1	1	1	0	1	1	0	1	1	0	0	947	Australia	New South Wales	Cardiff	22
2019-06-03 17:36:02	79	1	1	1	1	1	1	1	1	1	1	1	1	0	0	1	1	0	1	1	1	1	1	0	1	1	1	1	0	0	0	532	Australia	South Australia	Adelaide	23
2019-05-29 02:47:33	80	1	0	1	0	1	1	1	1	1	1	1	1	1	1	1	1	1	0	1	1	1	1	0	1	0	1	1	0	0	0	437	Australia	Queensland	Moorooka	22
2019-05-30 20:48:47	81	1	1	1	0	1	1	1	1	0	0	1	0	0	1	1	1	1	1	1	1	1	1	0	1	1	0	1	0	0	0	550	Australia	New South Wales	Baulkham Hills	20
2019-05-29 15:50:33	82	1	1	1	0	1	0	1	1	1	1	1	1	0	1	1	1	1	1	0	1	1	1	1	1	1	1	0	0	0	0	296	Australia	New South Wales	Lakemba	22
2019-05-31 14:00:19	83	1	1	1	1	1	0	0	1	1	1	1	1	0	0	1	1	1	1	1	1	1	1	0	1	0	1	0	1	0	0	506	Australia	New South Wales	Lakemba	21
2019-05-30 20:04:01	84	1	0	1	1	1	1	0	1	0	1	1	0	0	0	0	0	1	0	0	0	1	0	0	1	1	1	0	0	0	0	185138	Australia	New South Wales	Crows Nest	13
2019-06-03 16:11:41	85	1	1	1	0	1	0	1	1	1	0	1	0	0	0	1	1	1	0	0	1	1	1	0	1	0	1	0	0	0	0	519	Australia	New South Wales	Sydney	16
2019-05-29 10:18:06	86	1	1	1	1	1	1	1	1	0	1	1	1	1	1	1	1	1	1	1	1	1	1	0	1	1	1	0	1	1	0	395	Australia	South Australia	Parafield Gardens	26
2019-05-30 19:55:08	87	1	1	1	1	1	1	0	1	1	1	0	0	1	1	1	1	0	1	1	1	1	1	1	1	1	0	0	1	1	0	316	Denmark	Central Jutland	Aarhus	23
